# Supplementary material for: Simplified Insertion of Transgenes Onto Balancer Chromosomes via Recombinase-Mediated Cassette Exchange
Source: PubMed Central journal article supplement (PMC3362938; doi:10.1534/g3.112.002097), 2012-05-01
Supplement: supp_2.5.551_FigureS1.pdf [file supp_2.5.551_FigureS1.pdf]

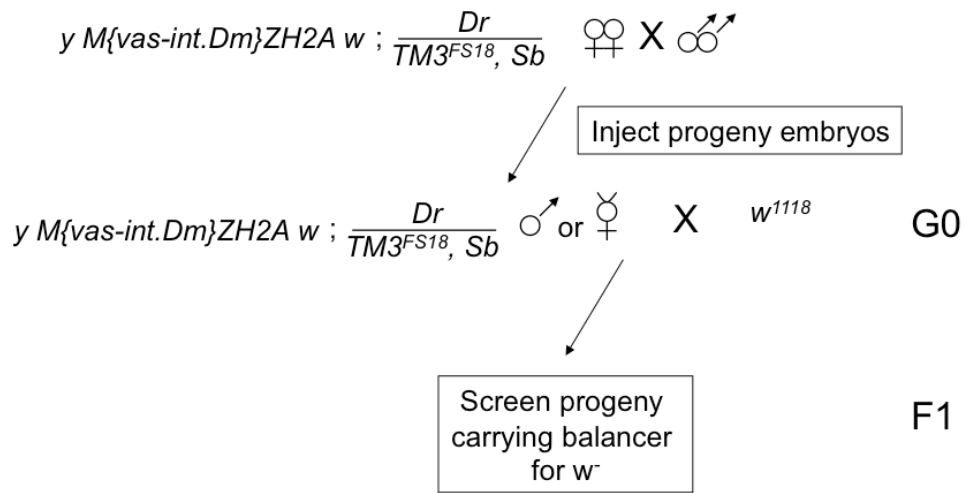

**Figure S1** Alternate injection scheme for RMCE using a target on a balancer chromosome. In this scheme, the integrase source and balancer are combined in the stock  $y M\{vas-int.Dm\}ZH2A w ; Dr/TM3^{FS18}$ , alleviating the need to obtain virgin females. In the G0 generation, 50% of embryos will have the desired genotype on the third chromosome ( $Dr/TM3$ ), while 50% will have a lethal genotype ( $Dr/Dr$  or  $TM3/TM3$ ); either males or females are mated singly to  $w^{1118}$ . In the F1, all  $w^- Sb$  progeny will represent insertions onto the balancer (males only shown for simplicity, females can also be screened).
