# Supplementary material for: Simplified Insertion of Transgenes Onto Balancer Chromosomes via Recombinase-Mediated Cassette Exchange
Source: PubMed Central journal article supplement (PMC3362938; doi:10.1534/g3.112.002097), 2012-05-01
Supplement: supp_2.5.551_FigureS2.pdf [file supp_2.5.551_FigureS2.pdf]

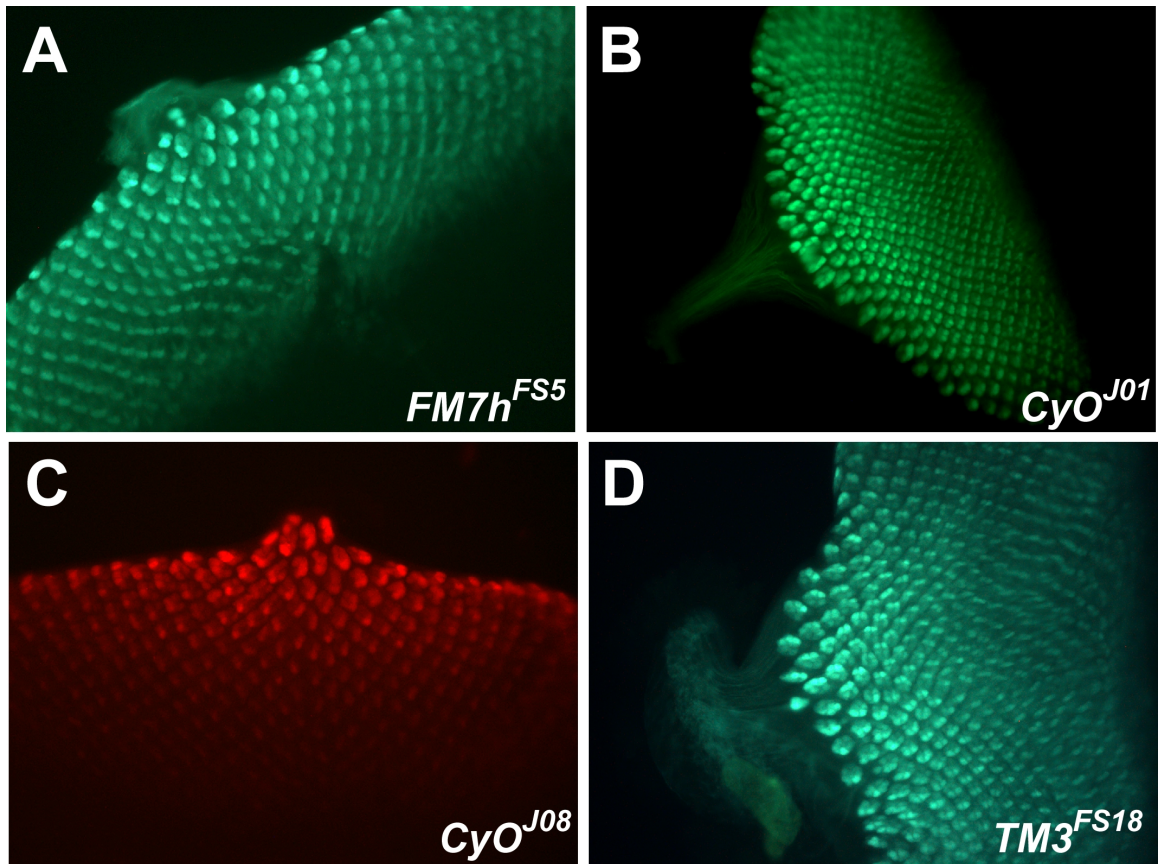

**Figure S2** Larval expression of fluorescent reporters inserted onto balancer chromosomes. Eye discs from wandering third instar larvae show expression of *GMR-GFP* (A, B and D) or *GMR-mCherry* (C) inserted onto *FM7h<sup>FS5</sup>* (A), *CyO<sup>J01</sup>* (B), *CyO<sup>J08</sup>* (C), or *TM3<sup>FS18</sup>* (D).
