# Supplementary material for: Simplified Insertion of Transgenes Onto Balancer Chromosomes via Recombinase-Mediated Cassette Exchange
Source: PubMed Central journal article supplement (PMC3362938; doi:10.1534/g3.112.002097), 2012-05-01
Supplement: supp_2.5.551_TableS1.pdf [file supp_2.5.551_TableS1.pdf]

**Table S1** Local chromosomal features of mapped transgenic insertions.

| Insertion<br>(Balancer) | Chromatin State <sup>1</sup>               |                                                |    | Position Relative to<br>Nearest Gene                      | RNA-seq Coverage of<br>Developmental Stages <sup>2</sup> for Nearest<br>Gene |
|-------------------------|--------------------------------------------|------------------------------------------------|----|-----------------------------------------------------------|------------------------------------------------------------------------------|
|                         | Kc                                         | BG3                                            | S2 |                                                           |                                                                              |
| J04<br>(Cy0)            | Active euchromatin, usu. broadly expressed | Active promoter/<br>transcription start        |    | 20 nt into first exon of <i>CG10641</i>                   | <i>CG10641</i> is expressed throughout development                           |
| J08<br>(Cy0)            | Active euchromatin, usu. broadly expressed | Active transcribed intron (enhancer)           |    | First intron of <i>spi</i>                                | <i>spi</i> is expressed throughout development                               |
| FSX4<br>(FM7h)          | Silent, but probably dynamic               | Actively transcribed exon on male X            |    | Exon of C, intron of F and B transcripts of <i>RhoGAP</i> | <i>RhoGAP</i> is expressed throughout development                            |
| FSX5<br>(FM7h)          | Silent, but probably dynamic               | Actively transcribed exon on male X            |    | 400 nt downstream of <i>Sxl</i>                           | <i>Sxl</i> is expressed throughout development                               |
| FSX2<br>(FM7h)          | Active euchromatin, usu. dev. regulated    | Actively transcribed exon on male X            |    | First intron of <i>dlg1</i>                               | <i>dlg1</i> is expressed throughout development                              |
| FSIII18<br>(TM3)        | Active euchromatin, usu. dev. regulated    | Actively transcribed intron                    |    | First intron of <i>ttk</i>                                | <i>ttk</i> is expressed throughout development                               |
| FSIII10<br>(TM3)        | Active euchromatin, usu. dev. regulated    | Active promoter/<br>transcription start region |    | Second intron of <i>mub</i>                               | <i>mub</i> is expressed throughout development                               |
| FSIII11<br>(TM3)        | Active euchromatin, usu. broadly expressed | Active promoter/<br>transcription start region |    | 1 nt into first exon of <i>CG8043</i>                     | <i>CG8043</i> is expressed throughout development                            |

<sup>1</sup>(FILION *et al.* 2010; KHARCHENKO *et al.* 2011)<sup>2</sup>(GRAVELEY *et al.* 2011)
